# Supplementary material for: Laser photolysis studies of ω-bond dissociation in aromatic carbonyls with a C–C triple bond stimulated by triplet sensitization
Source: Royal Society of Chemistry journal article supplement (doi:10.1039/c7cp02758c), 2017-01-01
Supplement: c7cp02758c1.pdf [file c7cp02758c1.pdf]

The Electronic Supplementary Information for

## **Laser Photolysis Studies of $\omega$ -Bond Dissociation in Aromatic Carbonyls Having C-C Triple Bond Stimulated by Triplet Sensitization**

**Minoru Yamaji,<sup>1,\*</sup> Ami Horimoto<sup>2</sup> and Bronislaw Marciniak<sup>3</sup>**

<sup>1</sup> Division of Molecular Science, Graduate School of Science and Engineering, Gunma University, Kiryu, Gunma 376-8515, Japan

<sup>2</sup> Education Program of Materials and Bioscience, Graduate School of Science and Engineering, Gunma University, Kiryu, Gunma 376-8515, Japan

<sup>3</sup> Faculty of Chemistry, Adam Michiewicz University, Umultowska 89 b, 61-614 Poznan, Poland

### **Contents**

|                                                         |              |
|---------------------------------------------------------|--------------|
| <b>1. Preparation and NMR data for compounds 2-4@X.</b> | <b>P. 2</b>  |
| <b>2. Quenching data for triplet energy transfer.</b>   | <b>P. 9</b>  |
| <b>3. Results of DFT calculation</b>                    | <b>P. 12</b> |

## 1. Preparation and NMR data for compounds 2-4@X.

### 1-1. Synthesis of 2@X (X = OPh and SPh).

#### 1-1-1. Preparation of 2@OPh

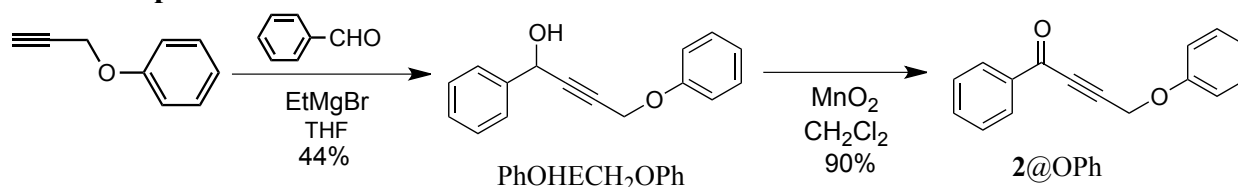

#### Step 1. Synthesis of PhOHECH<sub>2</sub>OPh

To a THF solution (1 M, 2.3 ml) of ethylmagnesium bromide (2.3 mmol), phenylpropargyl ether (0.3 ml, 2 mmol) in THF (13 ml) was dropwise added under N<sub>2</sub> atmosphere at room temperature, and the solution was stirred for 30 min at 40 °C. After cooling to room temperature, benzaldehyde (0.23 ml, 2 mmol) in THF (12 ml) was dropwise added at room temperature, and the solution was stirred under N<sub>2</sub> atmosphere at room temperature for 3 h. The crude product was extracted with benzene, washed with saturated aqueous NaHCO<sub>3</sub> and brine, and dried with Na<sub>2</sub>SO<sub>4</sub>, which was purified by chromatography on silica gel using a mixture of hexane/chloroform (5:1 v/v) as the eluent to provide 210 mg PhOHECH<sub>2</sub>OPh (44 %). Pale yellow liquid. <sup>1</sup>H NMR (400 MHz, CDCl<sub>3</sub>) δ<sub>H</sub> 7.28-7.38 (m, 7H), 6.96-7.02 (m, 3H), 5.48 (s, 1H) 4.77 (d, 2H, *J* = 1.8 Hz), 1.44 (s, 1H).

#### Step 2. Synthesis of 2@OPh

PhOHCH<sub>2</sub>OPh (210 mg, 0.88 mmol) in dichloromethane (10 ml) was stirred in the presence of MnO<sub>2</sub> (539 mg, 6.2 mmol) for 2 h at room temperature. The solution was filtrated and the solvent was evaporated. The residue was chromatographed on silica gel using a mixture of hexane/ethyl acetate (5:1 v/v) as the eluent to provide 187 mg BECH<sub>2</sub>OPh (yield 90 %). Yellow liquid. <sup>1</sup>H NMR (400 MHz, CDCl<sub>3</sub>) δ<sub>H</sub> 8.01 (d, 2H, *J* = 8.4 Hz), 7.56-7.60 (m, 1H), 7.40-7.44 (m, 2H), 7.32-7.37 (m, 2H), 7.03-7.07 (m, 3H), 4.98 (s, 2H).

#### 1-1-2. Preparation of 2@SPh

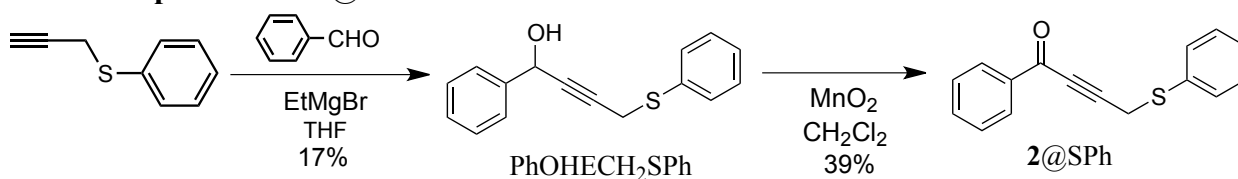

#### Step 1. Synthesis of PhOHECH<sub>2</sub>SPh

To a THF solution (1 M, 2.2 ml) of ethylmagnesium bromide (2.2 mmol), phenylpropargyl sulfide (0.29 ml, 2 mmol) in THF (10 ml) was dropwise added under N<sub>2</sub> atmosphere at room temperature, and the solution was stirred for 30 h at room temperature. After cooling to room temperature, benzaldehyde (0.23 ml, 2 mmol) in THF (10 ml) was dropwise added at 0 °C, and the solution was stirred under N<sub>2</sub> atmosphere at room temperature for 5 h. The crude product was extracted with benzene, washed with saturated aqueous NaHCO<sub>3</sub> and brine, and dried with Na<sub>2</sub>SO<sub>4</sub>, which was purified by chromatography on silica gel using a mixture of hexane/chloroform (5:1 v/v) as the eluent

to provide 84 mg PhOHECH<sub>2</sub>SPh. Yield 17 %. Pale yellow liquid. <sup>1</sup>H NMR (400 MHz, CDCl<sub>3</sub>) δ<sub>H</sub> 7.24-7.38 (m, 10H), 5.41 (s, 1H) 3.68 (d, 2H, *J* = 1.8 Hz), 2.03 (s, 1H).

## Step 2. Synthesis of 2@SPh

PhOHCH<sub>2</sub>SPh (84 mg, 0.3 mmol) in dichloromethane (3 ml) was stirred in the presence of MnO<sub>2</sub> (262 mg, 2.1 mmol) for 2 h at room temperature. The solution was filtrated and the solvent was evaporated. The residue was chromatographed on silica gel using a mixture of hexane/ ethyl acetate (5:1 v/v) as the eluent to provide 30 mg 2@SPh. yield 39 %. Yellow liquid. <sup>1</sup>H NMR (400 MHz, CDCl<sub>3</sub>) δ<sub>H</sub> 7.93 (dd, 2H, *J* = 9.7 Hz), 7.51-7.58 (m, 3H), 7.28-7.41 (m, 5H), 3.96 (s, 2H).

## 1-2. Synthesis of 3@X (X = OPh and SPh)

### 1-2-1. Preparation of 3@OPh

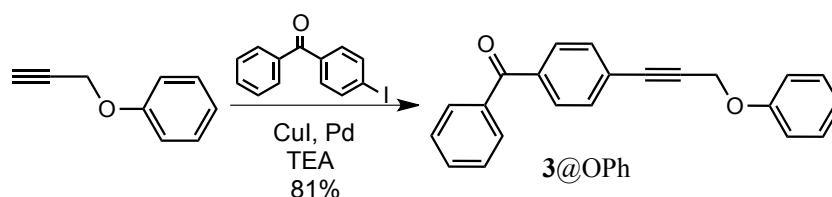

Triethylanime (TEA, 14 ml) solution of phenylpropargyl ether (0.12 ml, 0.97 mmol), CuI (20 mg, 0.097 mmol), PdCl<sub>2</sub>(PPh<sub>3</sub>)<sub>2</sub> (35 mg, 0.049 mmol) and 4-iodobenzophenone 300 mg (0.97 mmol) was stirred under N<sub>2</sub> atmosphere for 3 h at room temperature. Benzene (100 ml) was added, and filtrated. The solution was washed with aqueous Na<sub>2</sub>S<sub>2</sub>O<sub>3</sub>, saturated aqueous NaHCO<sub>3</sub> and brine, dried with Na<sub>2</sub>SO<sub>4</sub> and evaporated. The crude product was purified by column chromatography on silica gel with hexane/ethyl acetate (5:1, v/v) as the developing solvent to provide 244 mg 3@OPh. Yield 81 %. Pale yellow solid. <sup>1</sup>H NMR (400 MHz, CDCl<sub>3</sub>) δ<sub>H</sub> 7.74-7.78 (m, 4H), 7.46-7.61 (m, 5H), 7.33 (t, 2H, *J* = 8.7 Hz), 6.99-7.06 (m, 3H), 4.94 (s, 2H).

### 1-2-2. Preparation of 3@SPh

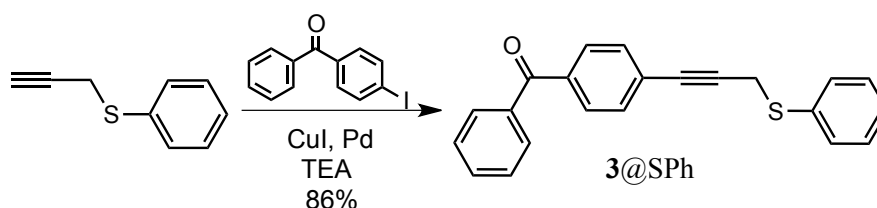

Triethylanime (TEA, 11 ml) solution of phenylpropargyl sulfide (0.13 ml, 0.97 mmol), CuI (20 mg, 0.097 mmol), PdCl<sub>2</sub>(PPh<sub>3</sub>)<sub>2</sub> (35 mg, 0.049 mmol) and 4-iodobenzophenone 300 mg (0.97 mmol) was stirred under N<sub>2</sub> atmosphere for 3 h at room temperature. Benzene (100 ml) was added, and filtrated. The solution was washed with aqueous Na<sub>2</sub>S<sub>2</sub>O<sub>3</sub>, saturated aqueous NaHCO<sub>3</sub> and brine, dried with Na<sub>2</sub>SO<sub>4</sub> and evaporated. The crude product was purified by column chromatography on silica gel with hexane/ethyl acetate (9:1, v/v) as the developing solvent to provide 273 mg 3@SPh. Yield 86 %. Pale yellow solid. <sup>1</sup>H NMR (400 MHz, CDCl<sub>3</sub>) δ<sub>H</sub> 7.70-7.78 (m, 4H), 7.42-7.60 (m, 7H), 7.24-7.36 (m, 3H), 3.85 (s, 2H).

### 1-3. Synthesis of 4@X (X = H, Br, SPh, OPh)

#### 1-3-1. Preparation of 4@H

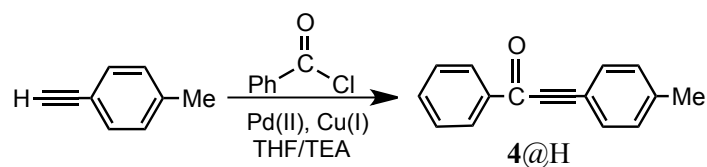

To a THF (20 ml) solution of *trans*-dichlorobis(triphenylphosphine)palladium(II) ( $\text{PdCl}_2(\text{PPh}_3)_2$ ) (79.4 mg, 0.112 mmol) and copper(I)iodide (CuI, 44.3 mg, 0.224 mmol) stirred for 10 min under  $\text{N}_2$  atmosphere, trimethylamine (TEA, 0.8 ml, 5.68 mmol), benzoyl chloride (0.96 ml, 6.8 mmol) and *p*-ethynyltoluene (0.86 ml, 6.8 mmol) were added, and the solution was refluxed for 3 h. The crude product was extracted with benzene (50 ml  $\times$  3). The benzene solution was washed with saturated aqueous  $\text{NaHCO}_3$  and brine, and dried with  $\text{Na}_2\text{SO}_4$ . The product was purified by passing through a silica-gel column with a mixture of hexane/ethyl acetate (9:1, v/v) as the eluent. Pale yellow solid. Yield 55% (0.68 g).  $^1\text{H}$  NMR (400 MHz,  $\text{CDCl}_3$ )  $\delta_{\text{H}}$  8.22 (dd, 2H,  $J = 8.4$  Hz), 7.57-7.64 (m, 3H), 7.49-7.53 (m, 2H), 7.21-7.25 (m, 2H), 2.40 (s, 3H).

#### 1-3-2. Preparation of 4@Br

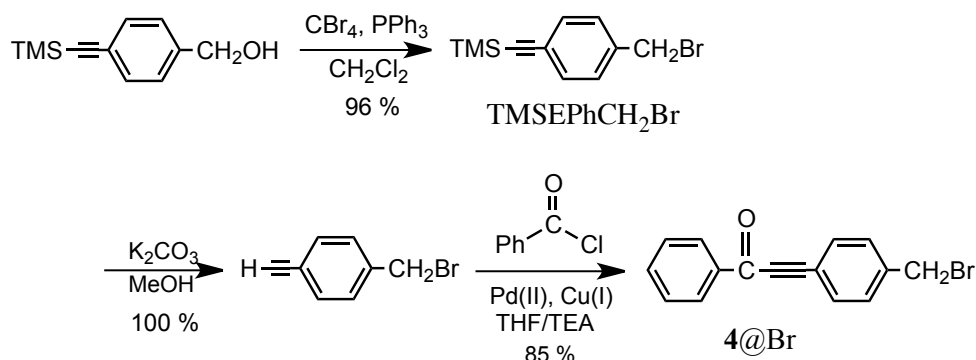

##### Step 1. Synthesis of *p*-trimethylsilylethynylbenzyl bromide (TMSEPhCH<sub>2</sub>Br)

To  $\text{CH}_2\text{Cl}_2$  solution (20 ml) of trimethylsilylethynylbenzyl alcohol (1.6 g) tetrabromomethane (4.5 g) and 2,6-lutidine (4.4 ml), a  $\text{CH}_2\text{Cl}_2$  solution (5 ml) of triphenylphosphine (3.9 g) was added dropwise at 0 °C. The solution was stirred at room temperature for 16 h. The crude product was extracted with benzene (50 ml  $\times$  3). The benzene solution was washed with saturated aqueous  $\text{NaHCO}_3$  and brine, and dried with  $\text{Na}_2\text{SO}_4$ . The product was purified by passing through a silica-gel column with a mixture of hexane/ethyl acetate (9:1, v/v) as the eluent. Yellow liquid. Yield 96% (1.92 g).  $^1\text{H}$  NMR (400 MHz,  $\text{CDCl}_3$ )  $\delta_{\text{H}}$  7.45 (d, 2H,  $J = 8.2$  Hz), 7.30 (d, 2H,  $J = 8.2$  Hz), 4.45 (s, 2H), 0.24 (s, 9H).

##### Step 2. Synthesis of *p*-ethynylbenzyl bromide (EPhCH<sub>2</sub>Br)

The methanol solution (25 ml) of TMSEPhCH<sub>2</sub>Br (1.0 g) in the presence of  $\text{K}_2\text{CO}_3$  (5.2 g) was stirred at room temperature. The solution was filtrated, and evaporated. The product solved in benzene was washed with saturated aqueous  $\text{NaHCO}_3$  and brine, dried with  $\text{Na}_2\text{SO}_4$ , and the solvent was evaporated. The product was used for the next process without further purification.

### Step 3. Synthesis of 4@Br

In THF (5 ml), added PdCl<sub>2</sub>(PPh<sub>3</sub>)<sub>2</sub> (17 mg, 0.024 mmol) and CuI (9 mg, 0.048 mmol), triethylamine (TEA, 0.17 ml, 1.26 mmol), benzoyl chloride (0.17 ml, 1.5 mmol) and EPhCH<sub>2</sub>Br (0.29 ml, 1.5 mmol) were stirred under N<sub>2</sub> atmosphere for 3 h at room temperature. Benzene (100ml) was added. The filtrated solution was washed with saturated aqueous NaHCO<sub>3</sub> and brine, and dried with Na<sub>2</sub>SO<sub>4</sub>. The solvent was evaporated, and the residue was chromatographed on a silica gel column using a mixture of hexane and ethyl acetate (9:1, v/v) as the developing solvent to obtain 4@Br (0.38 g). Yield 85 %. Yellow solid. <sup>1</sup>H NMR (400 MHz, CDCl<sub>3</sub>) δ<sub>H</sub> 8.20 (dd, 2H, *J* = 8.36 Hz), 7.60-7.65 (m, 3H), 7.51 (dd, 2H, *J* = 7.7 Hz), 7.42-7.44 (m, 2H).

### 1-3-3. Preparation of 4@OPh

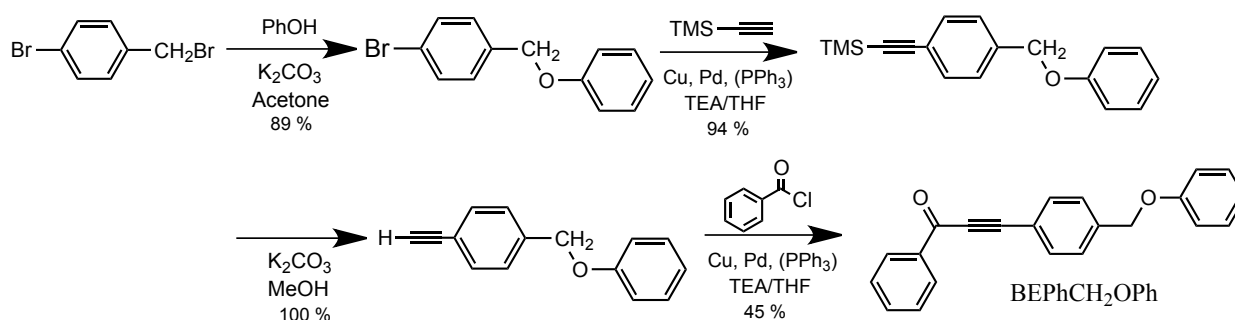

### Step 1. Synthesis of *p*-bromobenzylphenyl ether (BrPhCH<sub>2</sub>OPh)

To acetone 50 ml, *p*-bromobenzylbromide (1.28 g, 5 mmol), phenol (1.0 g, 10 mmol), K<sub>2</sub>CO<sub>3</sub> (3.6 g, 25 mmol) were added, and the solution was stirred for 4 h under N<sub>2</sub> atmosphere at 60 °C. The filtrated solution was evaporated. The residual was dissolved with benzene, and the solution was washed with brine, and dried with Na<sub>2</sub>SO<sub>4</sub>. The product was purified by column chromatography on silica gel with hexane/chloroform (5:1, v/v) as the eluent. White solid. Yield 89 % (1.18 g). <sup>1</sup>H NMR (400 MHz, CDCl<sub>3</sub>) δ<sub>H</sub> 7.50 (d, 2H, *J* = 8.5 Hz), 7.26-7.32 (m, 4H), 6.93-6.98 (m, 3H), 5.01 (s, 2H).

### Step 2. Synthesis of *p*-trimethylsilylethynylbenzylphenyl ether (TMSEPhCH<sub>2</sub>OPh)

In THF (17 ml), added BrPhCH<sub>2</sub>OPh (755 mg, 2.9 mmol), CuI (55 mg, 0.29 mmol), PdCl<sub>2</sub>(PPh<sub>3</sub>)<sub>2</sub> (105 mg, 0.15 mmol), trimethylsilylethyne (0.41 ml, 2.9 mmol) and TEA (17.1 ml) were stirred under N<sub>2</sub> atmosphere for 1 h at room temperature. Benzene (100ml) was added. The filtrated solution was washed with saturated aqueous NaHCO<sub>3</sub> and brine, and dried with Na<sub>2</sub>SO<sub>4</sub>. The solvent was evaporated, and the residue was chromatographed on a silica gel column using a mixture of hexane and chloroform (3:1, v/v) as the developing solvent to obtain TMSEPhCH<sub>2</sub>OPh (761 mg). Yield 94 %. Pale yellow solid. <sup>1</sup>H NMR (400 MHz, CDCl<sub>3</sub>) δ<sub>H</sub> 7.50 (d, 2H, *J* = 8.5 Hz), 7.26-7.37 (m, 4H), 6.94-6.96 (m, 3H), 5.05 (s, 2H), 0.24 (s, 9H).

### Step 3. Synthesis of *p*-ethynylbenzylphenyl ether (EPhCH<sub>2</sub>OPh)

In methanol (31 ml), added TMSEPhCH<sub>2</sub>OPh (761 mg, 2.7 mmol) and K<sub>2</sub>CO<sub>3</sub> (3.7 g) were stirred under N<sub>2</sub> atmosphere for 3.5 h at room temperature. The filtrated solution was evaporated. Benzene solution of the residue was washed with saturated aqueous NaHCO<sub>3</sub> and brine, and dried with Na<sub>2</sub>SO<sub>4</sub>,

and the solvent was evaporated. The product was used for the next process without further purification.

#### Step 4. Synthesis of 4@OPh

In THF (15.9 ml), added EPhCH<sub>2</sub>Oph (562 mg, 2.7 mmol), CuI (53 mg, 0.27 mmol), PdCl<sub>2</sub>(PPh<sub>3</sub>)<sub>2</sub> (99 mg, 0.14 mmol), PPh<sub>3</sub> (59 mg, 0.22 mmol), benzoyl chloride (0.37 ml, 3.2 mmol) and TEA (15.4 ml) were refluxed under N<sub>2</sub> atmosphere for 8 h. Benzene (100ml) was added. The filtrated solution was washed with saturated aqueous NaHCO<sub>3</sub> and brine, and dried with Na<sub>2</sub>SO<sub>4</sub>. The solvent was evaporated, and the residue was chromatographed on a silica gel column using a mixture of hexane and ethyl acetate (5:1, v/v) as the developing solvent to obtain 4@OPh (383 mg). Yield 45 %. Pale yellow solid. <sup>1</sup>H NMR (400 MHz, CDCl<sub>3</sub>) δ<sub>H</sub> 8.22 (dd, 2H, *J* = 8.4 Hz), 8.15 (dd, 2H, *J* = 8.4 Hz), 7.70 (d, 2H, *J* = 8.2 Hz), 7.50-7.54 (m, 5H), 6.95-6.99 (m, 3H).

#### 1-3-4. Preparation of 4@SPh

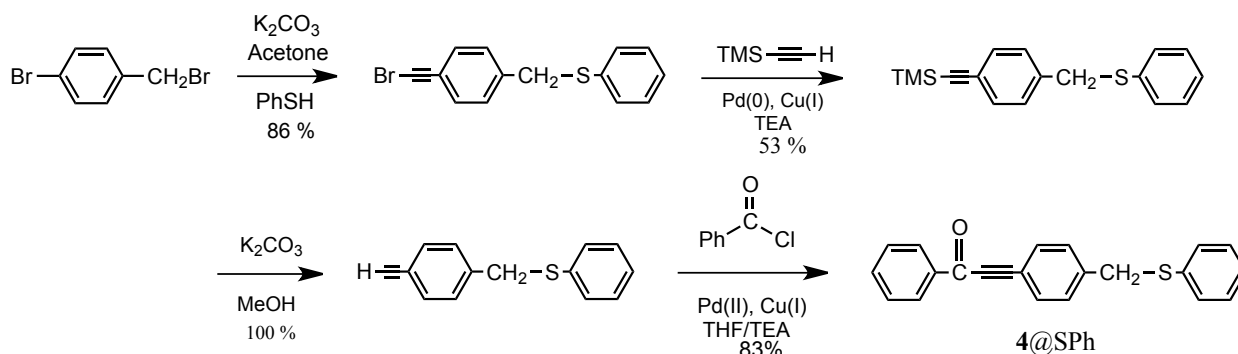

#### Step 1. Synthesis of *p*-bromobenzylphenyl sulfide (BrPhCH<sub>2</sub>SPh)

To acetone 50 ml, *p*-bromobenzylbromide (1.2 g, 4.4 mmol), thiophenol (0.9 ml, 8.8 mmol), K<sub>2</sub>CO<sub>3</sub> (3.1 g, 22 mmol) were added, and the solution was stirred for 8 h under N<sub>2</sub> atmosphere at 60 °C. The filtrated solution was evaporated. The residue was dissolved with benzene, and the solution was washed with brine, and dried with Na<sub>2</sub>SO<sub>4</sub>. The product was purified by column chromatography on silica gel with hexane/chloroform (3:1, v/v) as the eluent to obtain BrPhCH<sub>2</sub>SPh (1.11 g). Yield 86 %. White solid. <sup>1</sup>H NMR (400 MHz, CDCl<sub>3</sub>) δ<sub>H</sub> 7.38 (d, 2H, *J* = 8.5 Hz), 7.22-7.29 (m, 5H), 6.90 (d, 2H, *J* = 8.2 Hz), 4.02 (s, 2H).

#### Step 2. Synthesis of *p*-trimethylsilylethynylbenzylphenyl sulfide (TMSEPhCH<sub>2</sub>SPh)

In THF (21 ml), added BrPhCH<sub>2</sub>SPh (1.38 g, 4.9 mmol), CuI (94 mg, 0.49 mmol), PdCl<sub>2</sub>(PPh<sub>3</sub>)<sub>2</sub> (175 mg, 0.25 mmol), triphenylphosphin (103 mg, 0.39 mmol), trimethylsilylethynyl (0.83 ml, 5.9 mmol) and TEA (31 ml) were stirred under N<sub>2</sub> atmosphere for 5 h at 70 °C. Benzene (100 ml) was added. The filtrated solution was washed with saturated aqueous NaHCO<sub>3</sub> and brine, and dried with Na<sub>2</sub>SO<sub>4</sub>. The solvent was evaporated, and the residue was chromatographed on a silica gel column using a mixture of hexane and chloroform (5:1, v/v) as the developing solvent to obtain TMSEPhCH<sub>2</sub>SPh (774 mg). Yield 53 %. Pale yellow solid. <sup>1</sup>H NMR (400 MHz, CDCl<sub>3</sub>) δ<sub>H</sub> 7.40 (d, 2H, *J* = 8.0 Hz), 7.23-7.31 (m, 4H), 7.18-7.21 (m, 3H), 4.07 (s, 2H), 0.29 (s, 9H).

### Step 3. Synthesis of *p*-ethynylbenzylphenyl sulfide (EPhCH<sub>2</sub>SPh)

In methanol (20 ml), added TMSEPhCH<sub>2</sub>SPh (772 mg, 2.6 mmol) and K<sub>2</sub>CO<sub>3</sub> (3.7 g) were stirred under N<sub>2</sub> atmosphere for 3.5 h at room temperature. The filtrated solution was evaporated. Benzene solution of the residue was washed with saturated aqueous NaHCO<sub>3</sub> and brine, and dried with Na<sub>2</sub>SO<sub>4</sub>, and the solvent was evaporated. The product was used for the next process without further purification.

### Step 4. Synthesis of 4@SPh

In THF (15 ml), added EPhCH<sub>2</sub>SPh (628 mg, 2.8 mmol), CuI (53 mg, 0.27 mmol), PdCl<sub>2</sub>(PPh<sub>3</sub>)<sub>2</sub> (99 mg, 0.14 mmol), PPh<sub>3</sub> (60 mg, 0.22 mmol), benzoyl chloride (0.65 ml, 5.6 mmol) and TEA (20 ml) were refluxed under N<sub>2</sub> atmosphere for 8 h. Benzene (100 ml) was added. The filtrated solution was washed with saturated aqueous NaHCO<sub>3</sub> and brine, and dried with Na<sub>2</sub>SO<sub>4</sub>. The solvent was evaporated, and the residue was chromatographed on a silica gel column using a mixture of hexane and ethyl acetate (7:1, v/v) as the developing solvent to obtain 4@SPh (767 mg). Yield 83 %. Pale yellow solid. <sup>1</sup>H NMR (400 MHz, CDCl<sub>3</sub>) δ<sub>H</sub> 8.20 (d, 2H, *J* = 7.8 Hz), 8.15 (d, 2H, *J* = 8.0 Hz), 7.57-7.69 (m, 4H), 7.48-7.54 (m, 3H), 7.27-7.30 (m, 3H), 4.10 (s, 2H).

### 1-4. Synthesis of benzoylphenyl acetylene (BPA)

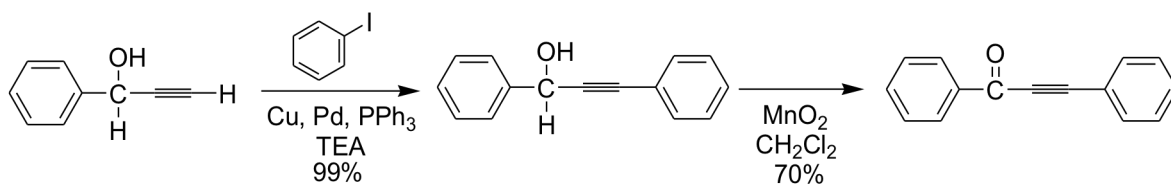

#### Step 1. Synthesis of PhOHEPh

To triethyl amine (TEA) 25 ml, iodobenzene 0.27 ml (2.4 mmol), 1-phenyl-2-propyn-1-ol 0.3 ml (2.4 mmol), CuI 46 mg (0.24 mmol), PdCl<sub>2</sub>(PPh<sub>3</sub>)<sub>2</sub> 86 mg (0.12 mmol), PPh<sub>3</sub> 55 mg (0.19 mmol) were added, the solution was stirred at 50 °C for 4 h under N<sub>2</sub> atmosphere. Benzene (100 ml) was added. The solution was filtrated, washed with aqueous NaHCO<sub>3</sub> and brine, and dried with Na<sub>2</sub>SO<sub>4</sub>. The solvent was evaporated, and the product was purified on silica gel chromatograph with hexane/ethyl acetate (4:1, v/v) as the eluent to obtain 495 mg PhOHEPh. Yield. 99 %. Pale yellow liquid. <sup>1</sup>H NMR (400 MHz, CDCl<sub>3</sub>) δ<sub>H</sub> 7.61 (d, 2H, *J* = 7.3 Hz), 7.29-7.48 (m, 7H), 5.68 (s, 1H), 2.59 (s, 1H).

#### Step 2. Synthesis of BPA

To dichloromethane 25 ml, PhOHEPh 495 mg (2.38 mmol) and MnO<sub>2</sub> 1.5 g (17 mmol) were added. The solution was vigorously stirred at room temperature for 1.5 h, and filtrated. After the solvent was evaporated, the product was purified on silica gel chromatograph with hexane/ethyl acetate (5:1, v/v) as the eluent to obtain 341 mg BPA. Yield 70 %. <sup>1</sup>H NMR (400 MHz, CDCl<sub>3</sub>) δ<sub>H</sub> 8.06-8.09 (m, 2H), 7.45-7.54 (m, 3H), 7.23-7.38 (m, 5H).

## 2. Quenching data for triplet energy transfer.

Quenching rate constants,  $k_q$  were obtained from the slope of the plots for the observed rates ( $k_{\text{obsd}}$ ) on triplet sensitization as a function of the concentration of  $n@X$  ( $n = 2 - 4$ ),  $[n@X]$ . When the plots of  $k_{\text{obsd}}$  show a straight line,  $k_{\text{obsd}}$  is expressed by eq S1.

$$k_{\text{obsd}} = k_0 + k_q[n@X] \quad (\text{S1})$$

Here,  $k_0$  is the decay rate of the triplet sensitizer.

### 2-1. Quenching data for 2@X.

Figure S1 shows rates ( $k_{\text{obsd}}$ ) of the triplet formation for the Ac/2@OPh system and the PTR formation for the Ac/2@SPh system plotted as a function of [2@X]. Since the plots show straight lines,  $k_{\text{obsd}}$  is expressed with eq S1. The  $k_0$  value was  $6.0 \times 10^5 \text{ s}^{-1}$  extrapolated for the decay rate of triplet Ac. From the slope of the line the  $k_q$  values were determined to be  $5.7 \times 10^9$  and  $3.5 \times 10^9 \text{ dm}^3 \text{ mol}^{-1} \text{ s}^{-1}$  for the Ac/2@OPh and Ac/2@SPh, respectively. The  $k_q$  values are rate constants for the triplet energy transfer from triplet Ac to 2@X.

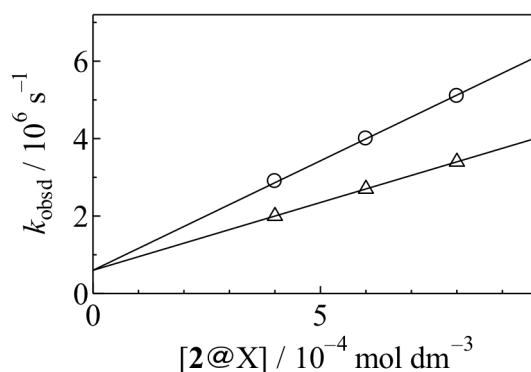

**Figure S1.** Formation rates of the intermediates plotted as a function of [2@X] upon 308 nm laser pulsing in ACN solution of the Ac ( $0.6 \text{ mol dm}^{-3}$ )/2@X systems.

### 2-2. Quenching data for 3@X.

Figure S2 shows decay rates ( $k_{\text{obsd}}$ ) of triplet XT for the XT/3@X system plotted as a function of [3@X]. Since the plots show straight lines,  $k_{\text{obsd}}$  is expressed with eq S1. The  $k_0$  value was  $3.2 \times 10^6 \text{ s}^{-1}$  for the decay rate of triplet XT. From the slope of the line, the  $k_q$  values were determined to be  $1.5 \times 10^{10}$  and  $1.2 \times 10^{10} \text{ dm}^3 \text{ mol}^{-1} \text{ s}^{-1}$  for the XT/3@OPh and XT/3@SPh, respectively. The  $k_q$  values



are rate constants for the triplet energy transfer from triplet XT to **3@X**.

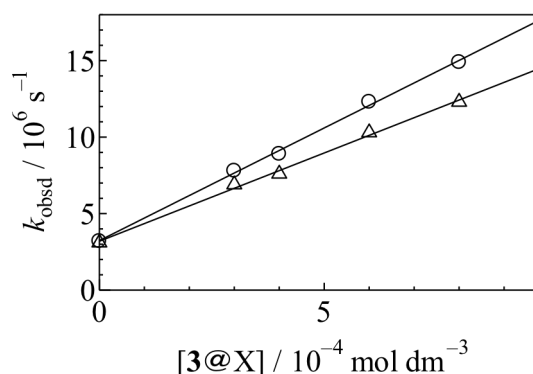

**Figure S2.** Decay rates of triplet XT plotted as a function of [**3@X**] upon 355 nm laser pulsing in ACN solution of the XT ( $9.0 \times 10^{-3}$  mol dm<sup>-3</sup>)/**3@X** systems.

### 2-3. Quenching data for **4@X**.

Figure S3 shows decay rates ( $k_{\text{obsd}}$ ) of triplet XT for the XT/**4@X** system plotted as a function of [**4@X**]. Since the plots show straight lines,  $k_{\text{obsd}}$  is expressed with eq S1. The  $k_0$  value was  $3.2 \times 10^6$  s<sup>-1</sup> for the decay rate of triplet XT. From the slope of the line, the  $k_q$  values were determined as listed in Table S1. The  $k_q$  values are rate constants for the triplet energy transfer from triplet XT to **4@X**.

**Table S1.** Quenching rate constant ( $k_q$ ) of **4@X** by XT in ACN.

| X   | $k_q / 10^{10}$ dm <sup>3</sup> mol <sup>-1</sup> s <sup>-1</sup> |
|-----|-------------------------------------------------------------------|
| H   | 1.2                                                               |
| OPh | 1.4                                                               |
| Br  | 1.3                                                               |
| SPh | 1.3                                                               |

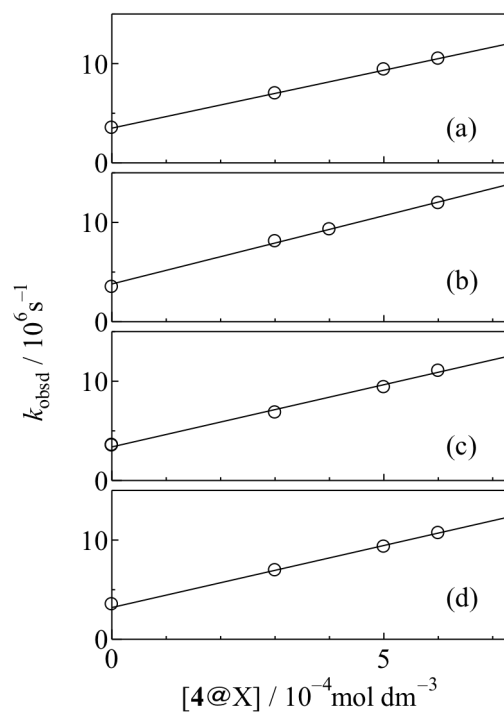

**Figure S3.** Decay rates of triplet XT plotted as a function of [4@X] upon 355 nm laser pulsing in ACN solution of XT ( $9.0 \times 10^{-3} \text{ mol dm}^{-3}$ )/4@H (a), /4@OPh (b), /4@Br (c) and /4@SPh (d) systems.

### 3. Results of DFT calculation

The calculation was carried out at the DFT level, using the Gaussian 09 software package.<sup>2</sup> The geometries of  $n@SPh$  and  $n@R$  were fully optimized by using the 6-31G(d) base set at the (U)B3LYP method. The calculated  $\Delta_f H$  values for  $n@SPh$  and  $n@R$  are, respectively, listed in Tables S2 and 3.

**Table S2.** Calculated heats of formation for  $n@SPh$ .

| Compound | $\Delta_f H(n@SPh) / \text{hartree}^a$ |
|----------|----------------------------------------|
| 1@SPh    | -1244.872295                           |
| 2@SPh    | -1090.03458                            |
| 3@SPh    | -1321.011247                           |
| 4@SPh    | -1321.013713                           |

a) 1 Hartree = 627.5095 kcal mol<sup>-1</sup>.

**Table S3.** Calculated heats of formation for the radicals ( $\Delta_f H(\text{Rad})$ ).

| Radical | $\Delta_f H(\text{Rad}) / \text{hartree}^a$ |
|---------|---------------------------------------------|
| 1@R     | -615.089064                                 |
| 2@R     | -460.256824                                 |
| 3@R     | -691.235753                                 |
| 4@R     | -691.232522                                 |
| PTR     | -629.706786                                 |

a) 1 Hartree = 627.5095 kcal mol<sup>-1</sup>.

Atom coordinates for the optimized geometries of  $n@SPh$ ,  $n@R$  and PTR in acetonitrile are as follows.

**Table S4.** Atom coordinates for the optimized geometry of 1@SPh

|   | X        | Y       | Z        |
|---|----------|---------|----------|
| C | -5.70589 | 1.46745 | 0.49706  |
| C | -5.75509 | 1.66819 | -0.88684 |
| C | -4.81840 | 1.04722 | -1.71564 |

|   |          |          |          |
|---|----------|----------|----------|
| C | -3.82176 | 0.24026  | -1.16453 |
| C | -3.76273 | 0.03591  | 0.22381  |
| C | -4.72484 | 0.64686  | 1.04618  |
| C | -2.76548 | -0.87789 | 0.86749  |
| O | -3.06094 | -1.46619 | 1.90821  |
| C | -1.41377 | -1.08311 | 0.25917  |
| C | -0.75565 | -0.09821 | -0.49277 |
| C | 0.53211  | -0.32332 | -0.97931 |
| C | 1.18875  | -1.53741 | -0.73936 |
| C | 0.52900  | -2.52009 | 0.01841  |
| C | -0.74560 | -2.29300 | 0.51975  |
| C | 2.57499  | -1.77888 | -1.27064 |
| S | 3.93050  | -1.48940 | -0.02434 |
| C | 3.87743  | 0.29487  | 0.18055  |
| C | 4.37942  | 1.14119  | -0.81946 |
| C | 4.36383  | 2.52465  | -0.63742 |
| C | 3.86618  | 3.07137  | 0.54921  |
| C | 3.37731  | 2.23085  | 1.55125  |
| C | 3.37591  | 0.84571  | 1.36725  |
| H | -6.43527 | 1.94761  | 1.14324  |
| H | -6.52459 | 2.30337  | -1.31675 |
| H | -4.86337 | 1.18841  | -2.79167 |
| H | -3.10753 | -0.25073 | -1.81721 |
| H | -4.68449 | 0.47098  | 2.11635  |
| H | -1.23694 | 0.85534  | -0.68271 |
| H | 1.03016  | 0.45214  | -1.55463 |
| H | 1.02473  | -3.46744 | 0.21488  |
| H | -1.24858 | -3.05142 | 1.11096  |
| H | 2.78373  | -1.15844 | -2.14543 |
| H | 2.71335  | -2.82611 | -1.55543 |
| H | 4.78388  | 0.71606  | -1.73360 |
| H | 4.75069  | 3.17446  | -1.41754 |
| H | 3.86264  | 4.14831  | 0.69209  |
| H | 2.98938  | 2.65091  | 2.47512  |
| H | 2.98750  | 0.19094  | 2.14121  |

---

Sum of electronic and zero-point energies = -1244.891787 Hartree

**Table S5.** Atom coordinates for the optimized geometry of **2**@SPh

---

|   | X       | Y        | Z        |
|---|---------|----------|----------|
| C | 5.10626 | -1.25027 | 0.21200  |
| C | 4.59443 | -1.97517 | -0.87083 |
| C | 3.34062 | -1.65730 | -1.39951 |
| C | 2.59615 | -0.61543 | -0.84820 |
| C | 3.10423 | 0.11472  | 0.23743  |

|   |          |          |          |
|---|----------|----------|----------|
| C | 4.36564  | -0.21024 | 0.76426  |
| C | 2.34251  | 1.23390  | 0.85484  |
| O | 2.77816  | 1.88599  | 1.80321  |
| C | 1.03648  | 1.55347  | 0.30127  |
| C | -0.05901 | 1.87198  | -0.11347 |
| C | -1.36557 | 2.24961  | -0.62929 |
| S | -2.22862 | 0.93969  | -1.61303 |
| C | -3.04865 | -0.04821 | -0.36063 |
| C | -2.55263 | -0.22528 | 0.93783  |
| C | -3.24516 | -1.03493 | 1.84150  |
| C | -4.41541 | -1.69109 | 1.45582  |
| C | -4.89997 | -1.52568 | 0.15584  |
| C | -4.22891 | -0.70115 | -0.74743 |
| H | 6.08105  | -1.49932 | 0.62116  |
| H | 5.17396  | -2.78707 | -1.30120 |
| H | 2.94422  | -2.21985 | -2.23957 |
| H | 1.62202  | -0.36535 | -1.25712 |
| H | 4.74531  | 0.36287  | 1.60363  |
| H | -1.25919 | 3.09057  | -1.32347 |
| H | -2.03138 | 2.57581  | 0.17604  |
| H | -1.62972 | 0.25260  | 1.24929  |
| H | -2.85619 | -1.15888 | 2.84848  |
| H | -4.94550 | -2.32442 | 2.16117  |
| H | -5.81274 | -2.02623 | -0.15529 |
| H | -4.62529 | -0.55735 | -1.74880 |

---

Sum of electronic and zero-point energies = - 1090.051569 Hartree

**Table S6.** Atom coordinates for the optimized geometry of **3@SPh**

|   | X        | Y        | Z        |
|---|----------|----------|----------|
| C | -7.48196 | 0.34358  | -1.02814 |
| C | -7.62897 | -0.95135 | -0.51876 |
| C | -6.58274 | -1.54588 | 0.18977  |
| C | -5.38307 | -0.85748 | 0.37621  |
| C | -5.22587 | 0.44154  | -0.13437 |
| C | -6.29377 | 1.03936  | -0.82555 |
| C | -3.99327 | 1.25882  | 0.09607  |
| O | -4.07344 | 2.48579  | 0.15458  |
| C | -2.65781 | 0.59919  | 0.25566  |
| C | -2.32431 | -0.61232 | -0.37192 |

|   |          |          |          |
|---|----------|----------|----------|
| C | -1.04545 | -1.14605 | -0.24775 |
| C | -0.06788 | -0.48551 | 0.52123  |
| C | -0.40189 | 0.73455  | 1.14694  |
| C | -1.67363 | 1.27003  | 1.00223  |
| C | 1.24045  | -1.03963 | 0.66184  |
| C | 2.35136  | -1.51333 | 0.78555  |
| C | 3.68188  | -2.08601 | 0.92313  |
| S | 4.77816  | -1.88482 | -0.56092 |
| C | 5.45799  | -0.23754 | -0.36523 |
| C | 4.80594  | 0.79907  | 0.31609  |
| C | 5.40367  | 2.05927  | 0.39974  |
| C | 6.63591  | 2.30447  | -0.20858 |
| C | 7.27789  | 1.27348  | -0.89959 |
| C | 6.70022  | 0.00598  | -0.97179 |
| H | -8.29559 | 0.80843  | -1.57762 |
| H | -8.55861 | -1.49266 | -0.67082 |
| H | -6.69964 | -2.54500 | 0.59942  |
| H | -4.58121 | -1.32115 | 0.94129  |
| H | -6.17160 | 2.04962  | -1.20277 |
| H | -3.05681 | -1.13017 | -0.98164 |
| H | -0.79329 | -2.07631 | -0.74639 |
| H | 0.34610  | 1.25167  | 1.73943  |
| H | -1.92664 | 2.21526  | 1.47101  |
| H | 3.62130  | -3.17089 | 1.06058  |
| H | 4.20858  | -1.67442 | 1.78995  |
| H | 3.83462  | 0.63688  | 0.77129  |
| H | 4.89249  | 2.85381  | 0.93665  |
| H | 7.09225  | 3.28802  | -0.14474 |
| H | 8.23996  | 1.44890  | -1.37324 |
| H | 7.21704  | -0.79661 | -1.49097 |

---

Sum of electronic and zero-point energies = -1321.032847 Hartree

**Table S7.** Atom coordinates for the optimized geometry of **4@SPh**

---

|   | X       | Y        | Z        |
|---|---------|----------|----------|
| C | 8.26619 | 0.76104  | -0.26176 |
| C | 7.79119 | 2.06156  | -0.05554 |
| C | 6.42335 | 2.28990  | 0.11641  |
| C | 5.52872 | 1.22110  | 0.08247  |
| C | 5.99893 | -0.08508 | -0.12344 |

|   |          |          |          |
|---|----------|----------|----------|
| C | 7.37532  | -0.30721 | -0.29548 |
| C | 5.07852  | -1.25636 | -0.16605 |
| O | 5.48700  | -2.40642 | -0.34215 |
| C | 3.66287  | -1.01142 | 0.00690  |
| C | 2.46098  | -0.87097 | 0.14461  |
| C | 1.05693  | -0.70216 | 0.30429  |
| C | 0.19468  | -1.81676 | 0.26077  |
| C | -1.17581 | -1.64641 | 0.41910  |
| C | -1.72390 | -0.37132 | 0.62834  |
| C | -0.86318 | 0.73671  | 0.66757  |
| C | 0.50904  | 0.58039  | 0.51077  |
| C | -3.20980 | -0.19195 | 0.78178  |
| S | -3.97594 | 0.08525  | -0.89806 |
| C | -5.70912 | 0.26790  | -0.45420 |
| C | -6.51196 | -0.86435 | -0.25409 |
| C | -7.86234 | -0.71579 | 0.06716  |
| C | -8.42057 | 0.56047  | 0.17955  |
| C | -7.62510 | 1.68999  | -0.02693 |
| C | -6.27160 | 1.54677  | -0.34052 |
| H | 9.32967  | 0.58511  | -0.39536 |
| H | 8.48763  | 2.89499  | -0.02908 |
| H | 6.05466  | 3.29883  | 0.27648  |
| H | 4.46549  | 1.39585  | 0.21538  |
| H | 7.72460  | -1.32206 | -0.45400 |
| H | 0.60967  | -2.80735 | 0.10509  |
| H | -1.83054 | -2.51297 | 0.38571  |
| H | -1.27420 | 1.72966  | 0.82822  |
| H | 1.16662  | 1.44294  | 0.54847  |
| H | -3.44323 | 0.67629  | 1.40271  |
| H | -3.67368 | -1.07895 | 1.21987  |
| H | -6.07936 | -1.85560 | -0.35337 |
| H | -8.47890 | -1.59673 | 0.22282  |
| H | -9.47295 | 0.67380  | 0.42440  |
| H | -8.05585 | 2.68385  | 0.05757  |
| H | -5.65069 | 2.42336  | -0.49903 |

---

Sum of electronic and zero-point energies = - 1321.035550 Hartree

**Table S8.** Atom coordinates for the optimized geometry of **1**@R

---

|  | X | Y | Z |
|--|---|---|---|
|--|---|---|---|

---

|   |          |          |          |
|---|----------|----------|----------|
| C | -3.99636 | 0.75852  | 1.61951  |
| C | -4.00095 | -0.44478 | 2.31667  |
| C | -2.79820 | -1.06760 | 2.63604  |
| C | -1.59248 | -0.49617 | 2.24683  |
| C | -1.58566 | 0.70824  | 1.54098  |
| C | -2.79234 | 1.33918  | 1.23533  |
| C | -0.29326 | 1.33813  | 1.13541  |
| O | -0.10207 | 2.53176  | 1.28669  |
| C | 0.74344  | 0.45547  | 0.52564  |
| C | 0.36933  | -0.66114 | -0.23186 |
| C | 1.33684  | -1.46070 | -0.82953 |
| C | 2.69733  | -1.15429 | -0.67381 |
| C | 3.07301  | -0.04890 | 0.10455  |
| C | 2.10129  | 0.75944  | 0.68511  |
| C | 3.69966  | -2.01404 | -1.24065 |
| H | -4.94198 | 1.25294  | 1.37372  |
| H | -4.95006 | -0.89955 | 2.61897  |
| H | -2.80053 | -2.01051 | 3.19265  |
| H | -0.64373 | -0.98788 | 2.49207  |
| H | -2.78881 | 2.29458  | 0.69759  |
| H | -0.69381 | -0.90426 | -0.34999 |
| H | 1.03991  | -2.32939 | -1.42683 |
| H | 4.13481  | 0.18120  | 0.24369  |
| H | 2.39782  | 1.63980  | 1.26811  |
| H | 4.41574  | -2.52483 | -0.60869 |
| H | 3.76047  | -2.16986 | -2.31062 |

---

Sum of electronic and zero-point energies = - 615.102042 Hartree

**Table S9.** Atom coordinates for the optimized geometry of **2**@R

|   | X        | Y        | Z        |
|---|----------|----------|----------|
| C | -2.96721 | 0.45330  | 0.00082  |
| C | -3.04654 | -0.94418 | 0.00020  |
| C | -1.87936 | -1.71264 | -0.00058 |
| C | -0.63312 | -1.08755 | -0.00072 |
| C | -0.54718 | 0.31336  | -0.00014 |
| C | -1.72448 | 1.07952  | 0.00063  |
| C | 0.76383  | 1.02258  | -0.00040 |
| O | 0.84410  | 2.25777  | -0.00070 |
| C | 1.96338  | 0.22829  | -0.00027 |



|   |          |          |          |
|---|----------|----------|----------|
| C | 3.03610  | -0.38840 | 0.00022  |
| C | 4.21083  | -1.07289 | 0.00075  |
| H | -3.87502 | 1.04972  | 0.00147  |
| H | -4.01726 | -1.43204 | 0.00031  |
| H | -1.94020 | -2.79699 | -0.00107 |
| H | 0.27478  | -1.68293 | -0.00127 |
| H | -1.64361 | 2.16145  | 0.00108  |
| H | 4.22759  | -2.15908 | 0.00144  |
| H | 5.16338  | -0.55058 | 0.00052  |

---

Sum of electronic and zero-point energies = - 460.267725 Hartree

**Table S10.** Atom coordinates for the optimized geometry of **3@R**

---

|   | X        | Y        | Z        |
|---|----------|----------|----------|
| C | -4.78189 | -0.25497 | -0.55085 |
| C | -4.68853 | -1.49048 | 0.09932  |
| C | -3.49341 | -1.86556 | 0.71664  |
| C | -2.38522 | -1.01825 | 0.67067  |
| C | -2.46881 | 0.22195  | 0.01663  |
| C | -3.68401 | 0.60013  | -0.57973 |
| C | -1.34036 | 1.20599  | -0.00255 |
| O | -1.58357 | 2.41374  | -0.02842 |
| C | 0.07979  | 0.73966  | 0.00500  |
| C | 0.48507  | -0.49649 | -0.53300 |
| C | 1.82597  | -0.85179 | -0.56425 |
| C | 2.81517  | 0.01922  | -0.04207 |
| C | 2.40182  | 1.26858  | 0.49315  |
| C | 1.06350  | 1.61883  | 0.50025  |
| C | 4.17254  | -0.34223 | -0.05753 |
| C | 5.37168  | -0.65986 | -0.06916 |
| C | 6.68207  | -1.00788 | -0.08194 |
| H | -5.71146 | 0.03997  | -1.02929 |
| H | -5.54700 | -2.15571 | 0.12789  |
| H | -3.42271 | -2.81675 | 1.23621  |
| H | -1.46626 | -1.31097 | 1.16785  |
| H | -3.74765 | 1.56732  | -1.06797 |
| H | -0.25057 | -1.17354 | -0.95342 |
| H | 2.12918  | -1.80147 | -0.99278 |
| H | 3.14964  | 1.94581  | 0.89308  |
| H | 0.75084  | 2.57916  | 0.89666  |

|   |         |          |          |
|---|---------|----------|----------|
| H | 7.00768 | -1.95991 | -0.49184 |
| H | 7.44446 | -0.34486 | 0.31752  |

---

Sum of electronic and zero-point energies = - 691.251111 Hartree

**Table S11.** Atom coordinates for the optimized geometry of **4@R**

|   | X        | Y        | Z        |
|---|----------|----------|----------|
| C | -5.26210 | -0.22672 | 0.00050  |
| C | -4.95023 | -1.59126 | 0.00021  |
| C | -3.61552 | -2.00508 | -0.00024 |
| C | -2.59199 | -1.05833 | -0.00039 |
| C | -2.89811 | 0.31129  | -0.00009 |
| C | -4.24201 | 0.71985  | 0.00034  |
| C | -1.83617 | 1.35840  | -0.00027 |
| O | -2.10595 | 2.56383  | -0.00067 |
| C | -0.46024 | 0.92497  | 0.00008  |
| C | 0.72317  | 0.62272  | 0.00009  |
| C | 2.09027  | 0.26906  | 0.00016  |
| C | 3.09609  | 1.27323  | 0.00029  |
| C | 4.42959  | 0.93017  | 0.00025  |
| C | 4.84599  | -0.44114 | 0.00002  |
| C | 3.81860  | -1.44044 | -0.00014 |
| C | 2.48543  | -1.09614 | -0.00005 |
| C | 6.19825  | -0.78870 | -0.00002 |
| H | -6.29995 | 0.09398  | 0.00087  |
| H | -5.74720 | -2.32965 | 0.00037  |
| H | -3.37276 | -3.06372 | -0.00046 |
| H | -1.55439 | -1.37806 | -0.00075 |
| H | -4.46397 | 1.78192  | 0.00055  |
| H | 2.79843  | 2.31714  | 0.00049  |
| H | 5.18905  | 1.70704  | 0.00036  |
| H | 4.10752  | -2.48779 | -0.00030 |
| H | 1.72054  | -1.86645 | -0.00016 |
| H | 6.97281  | -0.02863 | 0.00010  |
| H | 6.51140  | -1.82773 | -0.00021 |

---

Sum of electronic and zero-point energies = - 691.247712 Hartree

**Table S12.** Atom coordinates for the optimized geometry of PTR.

|   | X       | Y       | Z       |
|---|---------|---------|---------|
| S | 2.32862 | 0.00000 | 0.00002 |

|   |          |          |          |
|---|----------|----------|----------|
| C | 0.55325  | 0.00000  | -0.00020 |
| C | -0.14999 | 1.21567  | 0.00002  |
| C | -1.54576 | 1.20576  | 0.00006  |
| C | -2.25029 | 0.00000  | -0.00008 |
| C | -1.54576 | -1.20576 | 0.00006  |
| C | -0.14999 | -1.21567 | 0.00002  |
| H | 0.38558  | 2.16035  | 0.00013  |
| H | -2.08090 | 2.15145  | 0.00011  |
| H | -3.33615 | 0.00000  | -0.00009 |
| H | -2.08090 | -2.15145 | 0.00010  |
| H | 0.38558  | -2.16035 | 0.00013  |

---

Sum of electronic and zero-point energies = - 629.706786 Hartree
